# Supplementary material for: John Minor Wisdom Lecture: Wisdom on Weber
Source: Royal Society of Chemistry journal article supplement (doi:10.1039/c9ra10628f), 1999-01-01
Supplement: c9ra10628f1.pdf [file c9ra10628f1.pdf]

## Supporting Information

### **DMAP-stabilized bis(silyl)silylenes as versatile synthons for organosilicon compounds**

*Richard Holzner,<sup>†</sup> Dominik Reiter,<sup>†</sup> Philipp Frisch, and Shigeyoshi Inoue\**

Department of Chemistry, WACKER-Institute of Silicon Chemistry, Technische Universität München, Lichtenbergstraße 4, 85748 Garching bei München (Germany) \*E-mail: [s.inoue@tum.de](mailto:s.inoue@tum.de)

## Table of Contents

|                                                                       |    |
|-----------------------------------------------------------------------|----|
| 1. Experimental Section .....                                         | 3  |
| 1.1. General Methods and Instrumentation.....                         | 3  |
| 1.2. (tBu <sub>2</sub> MeSi) <sub>2</sub> Si:←DMAP ( <b>1b</b> )..... | 4  |
| 1.3. Bis(hypersilyl)silylene DMAP complex ( <b>1c</b> ).....          | 7  |
| 1.4. Silyl Radical <b>2</b> .....                                     | 9  |
| 1.5. Azasilepin <b>3</b> .....                                        | 10 |
| 1.6. Hexakis(trimethylsilyl)trisilirane ( <b>4</b> ) .....            | 14 |
| 1.7. Hydrosilanes <b>5a-c</b> .....                                   | 16 |
| 1.8. Siliranes <b>6</b> .....                                         | 17 |
| 1.9. Silimine <b>7a</b> .....                                         | 18 |
| 1.10. Silimine <b>7b</b> .....                                        | 19 |
| 2. X-ray Crystallographic Data .....                                  | 22 |
| 2.1. General Information.....                                         | 22 |
| 2.2 SC-XRD structures.....                                            | 23 |
| 2.3 Crystal data and structural refinement parameters .....           | 25 |
| 3. References.....                                                    | 26 |

# 1. Experimental Section

## 1.1. General Methods and Instrumentation

All manipulations were carried out under exclusion of water and oxygen under an atmosphere of argon 4.6 ( $\geq 99.996\%$ ) using standard Schlenk and glovebox techniques. The glassware used was heat dried under fine vacuum prior to use. All solvents were refluxed over sodium/benzophenone, freshly distilled under argon and deoxygenated prior to use. PTFE-based grease (*Triboflon III* from *Freudenberg & Co. KG*) was used as sealant. Deuterated benzene ( $C_6D_6$ ) was obtained from Sigma-Aldrich, dried over Na/K alloy, flask-to-flask condensed, deoxygenated by three freeze-pump-thaw cycles and stored over 3 Å molecular sieves in a glovebox. All NMR samples were prepared under argon in *J. Young* PTFE valve NMR tubes. The NMR spectra were recorded on a *Bruker DRX400* ( $^1H$ : 400.13 MHz,  $^{13}C$ : 100.62 MHz,  $^{29}Si$ : 79.49 MHz), *AV500* ( $^1H$ : 500.13 MHz) or *AV500C* ( $^1H$ : 500.36 MHz,  $^{13}C$ : 125.83 MHz,  $^{29}Si$ : 99.41 MHz) spectrometer at ambient temperature (300 K), unless otherwise stated. The  $^1H$ ,  $^{13}C\{^1H\}$  and  $^{29}Si\{^1H\}$  NMR spectroscopic chemical shifts  $\delta$  are reported in ppm relative to tetramethylsilane.  $^1H$  and  $^{13}C\{^1H\}$  NMR spectra are calibrated against the residual proton and natural abundance carbon resonances of the respective deuterated solvent as internal standard ( $C_6D_6$ :  $\delta(^1H) = 7.16$  ppm and  $\delta(^{13}C) = 128.1$  ppm).<sup>[S1]</sup> The following abbreviations are used to describe signal multiplicities: s = singlet, d = doublet, dd = doublet of doublets, m = multiplet, br = broad. In some NMR spectra, signals from silicone oil ( $C_6D_6$ :  $\delta(^1H) = 0.29$  ppm,  $\delta(^{13}C) = 1.4$  ppm and  $\delta(^{29}Si) = -21.8$  ppm), originating from the cannulas used (*B. Braun Melsungen AG Sterican®*), can be observed. EPR spectra were recorded on a *Jeol JES-Fa200* esr spectrometer with a spectrometer frequency of 9.267 GHz (X-band). Quantitative elemental analyses (EA) were measured with a *EURO EA (HEKAtech)* instrument equipped with a CHNS combustion analyzer at the *Laboratory for Microanalysis* at the *TUM Catalysis Research Center*. Melting Points (m.p.) were determined in sealed glass capillaries under inert gas by a *Büchi M-565* melting point apparatus. Unless otherwise stated, all commercially available chemicals were purchased from *abcr GmbH* or *Sigma-Aldrich* and used without further purification. Hydrogen ( $H_2$ ) 5.0 ( $\geq 99.999\%$ ) and ethylene 3.5 ( $\geq 99.95\%$ ) were purchased from *Westfalen AG* and used as received. The compounds  $((TMS)_3Si)_2SiBr_2$ ,<sup>[S2]</sup>  $(^tBu_2MeSi)_2SiBr_2$ ,<sup>[S3]</sup>  $(^tBu_3Si)_2SiBr_2$ ,<sup>[S4]</sup> and  $((TMS)_3Si)(^tBu_3Si)Si-DMAP$  (**1a**)<sup>[S5]</sup> were prepared as described in the corresponding references. Potassium graphite ( $KC_8$ ) was synthesized following a literature reported procedure upon heating a 1:8 mixture of potassium and graphite in a thick-walled, PTFE-capped pressurize-able Schlenk flask to 500 °C until a homogenous bronze powder was obtained.<sup>[S6]</sup>

## 1.2. (<sup>t</sup>Bu<sub>2</sub>MeSi)<sub>2</sub>Si:←DMAP (**1b**)

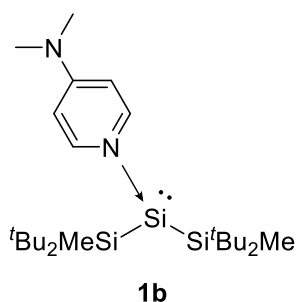

Si<sub>3</sub>C<sub>25</sub>H<sub>52</sub>N<sub>2</sub>

464.96 g/mol

THF (10 mL) was added to a mixture of (<sup>t</sup>Bu<sub>2</sub>MeSi)<sub>2</sub>SiBr<sub>2</sub> (300 mg, 597 μmol, 1.0 eq.), KC<sub>8</sub> (169 mg, 1.25 mmol, 2.1 eq.) and DMAP (72.9 mg, 597 μmol, 1.0 eq.) at ambient temperature. After stirring for 3 hours, the solvent was removed under reduced pressure and the residue was extracted with toluene (3 × 2 mL) to remove KBr and graphite. The solvent was evaporated *in vacuo* and compound **1b** was obtained as red-brown, crystalline solid (233 mg, 551 μmol, 92%). Crystals suitable for SC-XRD analysis were obtained from a cooled (-35 °C) toluene solution of **1b**.

**m.p.** = 140 °C (decomposition; color change from red-brown to black)

**<sup>1</sup>H NMR (500 MHz, C<sub>6</sub>D<sub>6</sub>, 300 K):** δ [ppm] = 8.66 (d, <sup>3</sup>J = 7.5 Hz, 2H, *o*-C<sup>DMAP</sup>H), 5.42 (d, <sup>3</sup>J = 7.5 Hz, 2H, *m*-C<sup>DMAP</sup>H), 1.76 (s, 6H, N(CH<sub>3</sub>)<sub>2</sub>), 1.41 (s, 36H, C(CH<sub>3</sub>)<sub>3</sub>), 0.42 (s, 6H, Si(CH<sub>3</sub>)).

**<sup>13</sup>C{<sup>1</sup>H} NMR (126 MHz, C<sub>6</sub>D<sub>6</sub>, 300 K):** δ [ppm] = 154.3 (*p*-C<sup>DMAP</sup>), 153.0 (*o*-C<sup>DMAP</sup>), 105.2 (*m*-C<sup>DMAP</sup>), 38.1 (N(CH<sub>3</sub>)<sub>2</sub>), 31.2 (C(CH<sub>3</sub>)<sub>3</sub>), 22.9 (C(CH<sub>3</sub>)<sub>3</sub>), -3.7 (Si(CH<sub>3</sub>)).

**<sup>29</sup>Si{<sup>1</sup>H} NMR (99 MHz, C<sub>6</sub>D<sub>6</sub>, 300 K):** δ [ppm] = 61.5 (Si), 11.8 (Si<sup>t</sup>Bu<sub>2</sub>Me).

Note: The chemical shifts of DMAP-stabilized silylenes **1** and silaimines **7** are dependent on the concentration of the NMR sample.

**EA:** Si<sub>3</sub>C<sub>25</sub>H<sub>52</sub>N<sub>2</sub> Calculated [%]: C (64.58), H (11.27), N (6.03)

Experimental [%]: C (64.34), H (11.33), N (5.98)

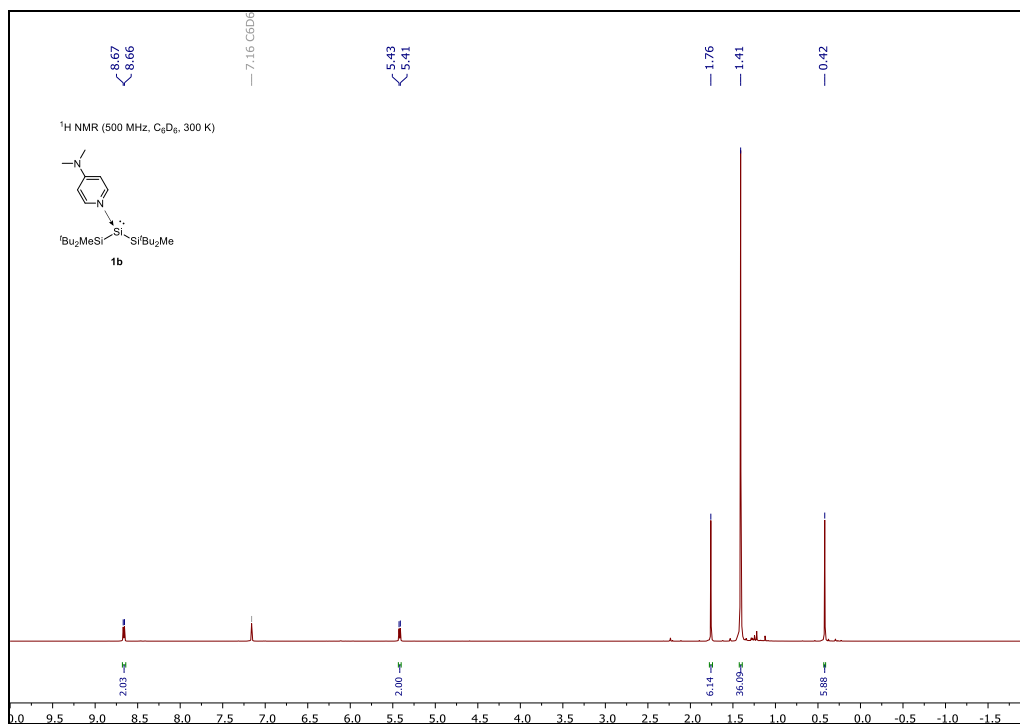

**Fig. S1:** <sup>1</sup>H NMR spectrum (500 MHz) of compound **1b** in C<sub>6</sub>D<sub>6</sub> at 300 K.

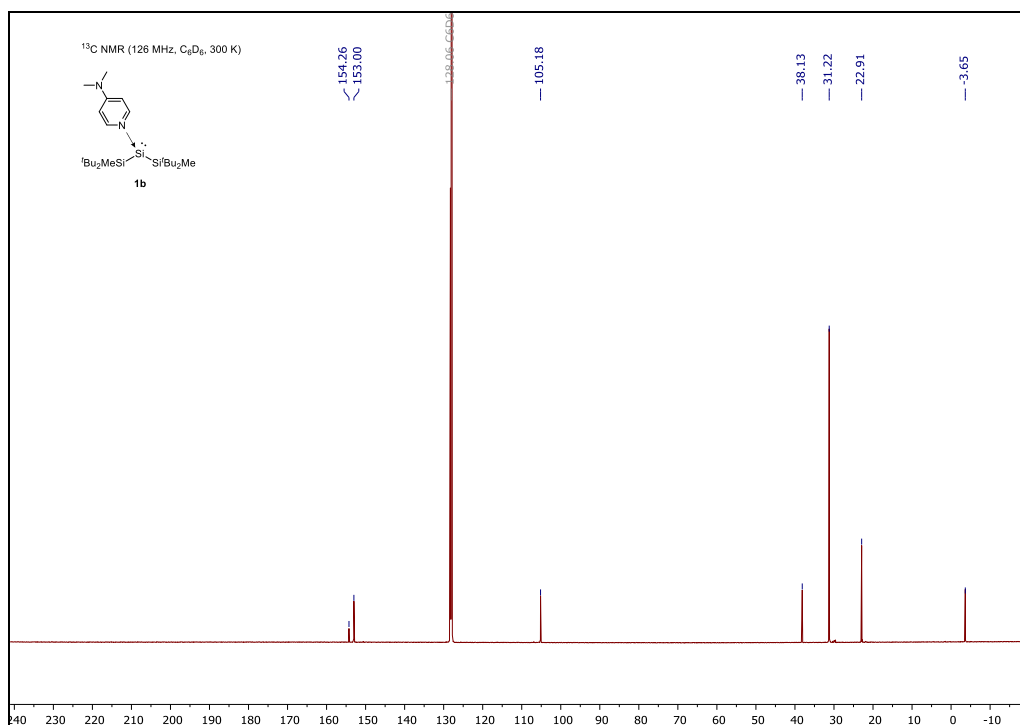

**Fig. S2:** <sup>13</sup>C NMR spectrum (126 MHz) of compound **1b** in C<sub>6</sub>D<sub>6</sub> at 300 K.

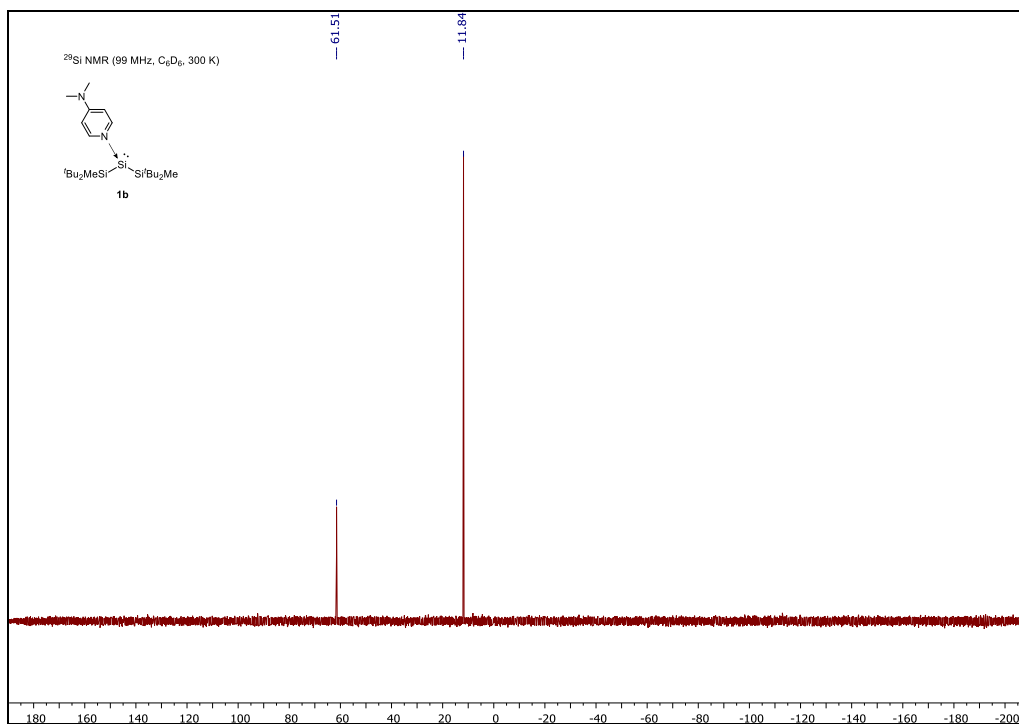

**Fig. S3:** <sup>29</sup>Si NMR spectrum (99 MHz) of compound **1b** in C<sub>6</sub>D<sub>6</sub> at 300 K.

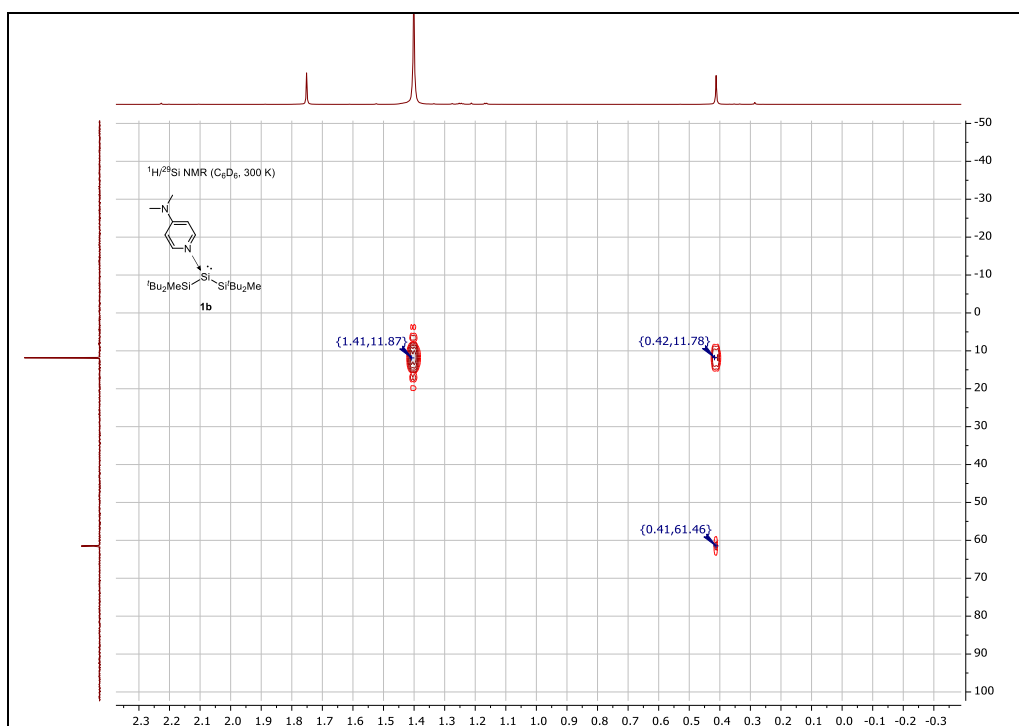

**Fig. S4:** <sup>1</sup>H/<sup>29</sup>Si HMBC NMR spectrum of compound **1b** in C<sub>6</sub>D<sub>6</sub> at 300 K.

### 1.3. Bis(hypersilyl)silylene DMAP complex (**1c**)

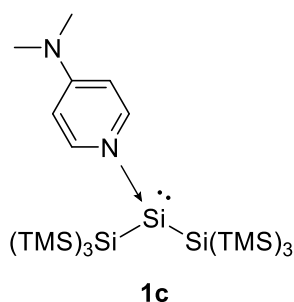

$\text{Si}_9\text{C}_{25}\text{H}_{64}\text{N}_2$

645.57 g/mol

THF (10 mL) was added to a mixture of  $(\text{TMS})_3\text{Si})_2\text{SiBr}_2$  (300 mg, 439  $\mu\text{mol}$ , 1.0 eq.),  $\text{KC}_8$  (125 mg, 922  $\mu\text{mol}$ , 2.1 eq.) and DMAP (53.7 mg, 439  $\mu\text{mol}$ , 1.0 eq.) at ambient temperature. After stirring for 3 hours, the solvent was removed under reduced pressure and the residue was extracted with toluene ( $3 \times 2$  mL) to remove KBr and graphite. The solvent was evaporated *in vacuo* and compound **1c** was obtained as dark-brown solid.

Note: During the synthesis of **1c**, the concomitant formation of hexakis(trimethylsilyl)trisilirane (**4**) and  $\text{Si}(\text{TMS})_4$  was observed. Therefore, no sample of **1c** with sufficient purity for elemental analysis was obtained and the yield was not determined.

$^1\text{H}$  NMR (500 MHz,  $\text{C}_6\text{D}_6$ , 300 K):  $\delta$  [ppm] = 8.65 (d,  $^3J = 7.1$  Hz, 2H,  $\text{o-C}^{\text{DMAP}}\text{H}$ ), 5.67 (d,  $^3J = 6.6$  Hz, 2H,  $\text{m-C}^{\text{DMAP}}\text{H}$ ), 1.73 (s, 6H,  $\text{N}(\text{CH}_3)_2$ ), 0.48 (s, 54H,  $\text{Si}(\text{CH}_3)_3$ ).

$^{29}\text{Si}\{^1\text{H}\}$  NMR (99 MHz,  $\text{C}_6\text{D}_6$ , 300 K):  $\delta$  [ppm] = 72.5 ( $\text{Si}$ ), -9.7 ( $\text{Si}(\text{CH}_3)_3$ ), -121.8 ( $\text{Si}(\text{TMS})_3$ ).

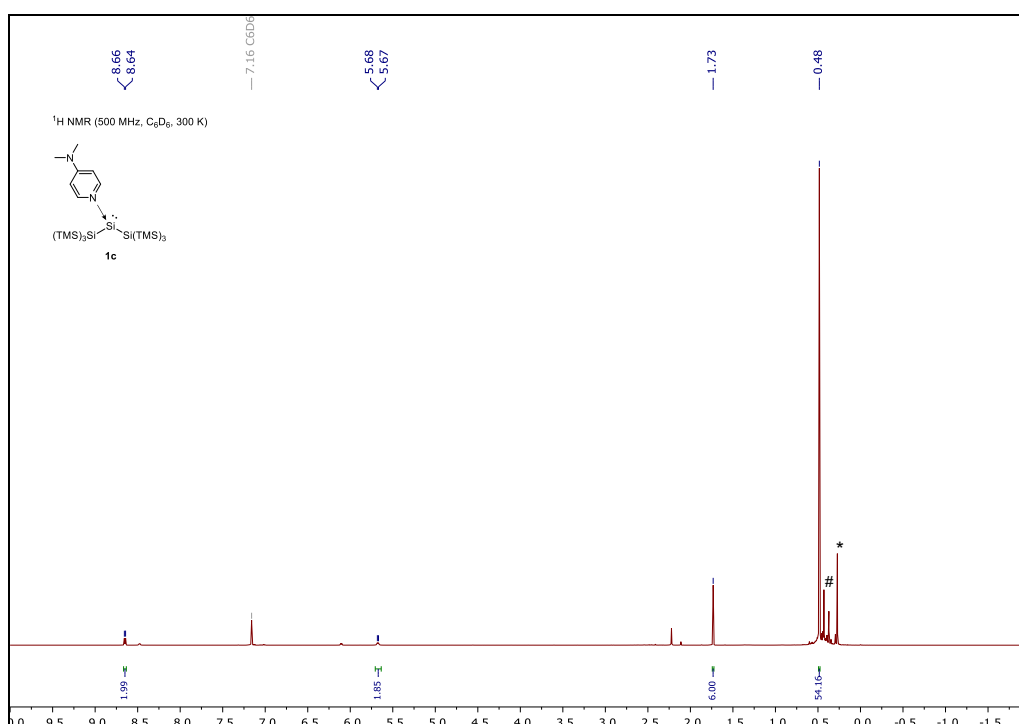

**Fig. S5:**  $^1\text{H}$  NMR spectrum (500 MHz) of compound **1c** in  $\text{C}_6\text{D}_6$  at 300 K. Signals labeled with \* and # belong to  $\text{Si}(\text{TMS})_4$  and hexakis(trimethylsilyl)trisilirane (**4**), respectively.

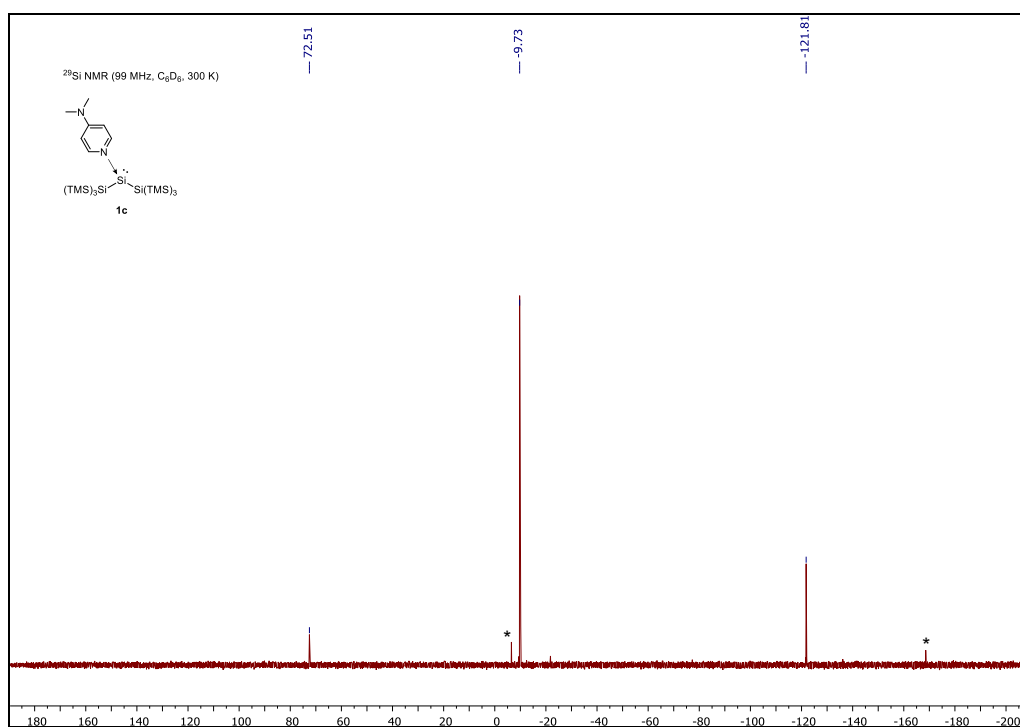

**Fig. S6:** <sup>29</sup>Si NMR spectrum (99 MHz) of compound **1c** in C<sub>6</sub>D<sub>6</sub> at 300 K. Signals labeled with \* belong to hexakis(trimethylsilyl)trisilirane (**4**).



## 1.4. Silyl Radical 2

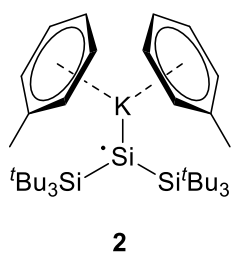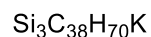

650.33 g/mol

Precooled THF (10 mL,  $-78\text{ }^\circ\text{C}$ ) was added to a mixture of  $(t\text{Bu}_3\text{Si})_2\text{SiBr}_2$  (100 mg,  $170\text{ }\mu\text{mol}$ , 1.0 eq.) and  $\text{KC}_8$  (92.2 mg,  $682\text{ }\mu\text{mol}$ , 3.5 eq.). The reaction mixture was allowed to warm to room temperature over 16 hours and the solvent was subsequently removed under reduced pressure. Concomitantly formed  $\text{KBr}$  and graphite were separated by extracting the residue with toluene ( $3 \times 4\text{ mL}$ ). Evaporation of the solvent *in vacuo* and subsequent washing of the residue with *n*-hexane ( $3 \times 2\text{ mL}$ ) afforded compound **2** as orange-brown solid (54.1 mg,  $88.5\text{ }\mu\text{mol}$ , 52%). Crystals suitable for SC-XRD analysis were obtained from a cooled ( $-35\text{ }^\circ\text{C}$ ) solution of **2** in toluene.

**m.p.** =  $60\text{ }^\circ\text{C}$  (decomposition; color change to dark red)

**EPR** (toluene, 286 K)  $g = 2.0056$ ,  $a(\alpha\text{-}^{29}\text{Si}) = 2.92\text{ mT}$

Note: Compound **2** is completely NMR silent. Elemental analysis was not matching, presumably because an unquantifiable amount of coordinating toluene was removed during drying compound **2** in fine vacuum. Due to its extreme air and moisture sensitivity and the fact, that it is not stable in toluene, no satisfactory spectroscopic data of **2** was obtained before addition of crown ether (18-C-6). With crown ether however, one signal in the EPR spectrum was observed (Fig. **S7**). Hyperfine coupling with the  $\beta\text{-}^{29}\text{Si}$  nuclei was not visible.

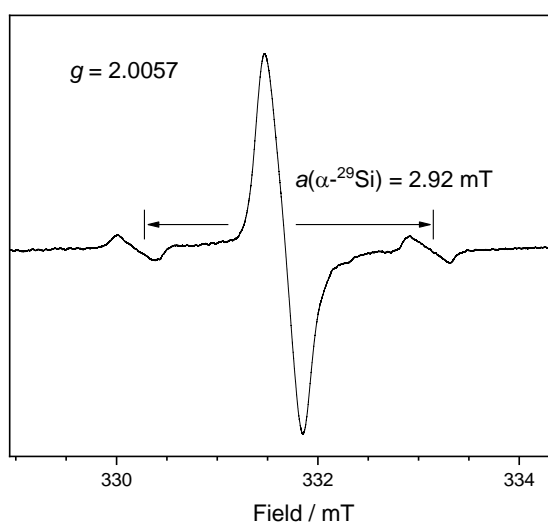

**Fig. S7:** X-band EPR spectrum of compound **2** + crown ether (18-C-6) in toluene ( $1 \times 10^{-4}\text{ M}$ , 286 K).

## 1.5. Azasilepin **3**

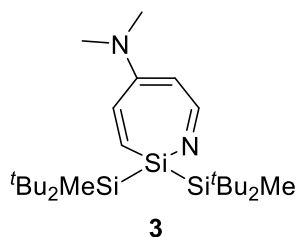

$\text{Si}_3\text{C}_{25}\text{H}_{52}\text{N}_2$

464.96 g/mol

A solution of DMAP-stabilized silylene **1b** (36.0 mg, 85.1  $\mu\text{mol}$ ) in benzene (2 mL) was heated to 65 °C for 16 h. The color changed from deep-brown to yellow. Evaporation of the solvent, afforded compound **3** as yellow solid (36.0 mg, 85.1  $\mu\text{mol}$ , quant.). Crystals suitable for SC-XRD analysis were obtained from a cooled (-35 °C) solution of **3** in *n*-hexane.

**$^1\text{H}$  NMR (500 MHz,  $\text{C}_6\text{D}_6$ , 300 K):**  $\delta$  [ppm] = 8.34 (d,  $^3J = 4.7$  Hz, 1H, NCH), 6.27 (dd,  $^3J = 15.5$  Hz,  $^4J = 2.5$  Hz, 1H, SiCHCH), 6.01 (d,  $^3J = 15.5$  Hz, 1H, SiCH), 4.68 (dd,  $^3J = 4.7$  Hz,  $^4J = 2.5$  Hz, 1H, NCHCH), 2.27 (s, 6H, N(CH $_3$ ) $_2$ ), 1.29 (s, 18H, C(CH $_3$ ) $_3$ ), 1.19 (s, 18H, C(CH $_3$ ) $_3$ ), 0.37 (s, 6H, Si(CH $_3$ )).

**$^{13}\text{C}\{^1\text{H}\}$  NMR (126 MHz,  $\text{C}_6\text{D}_6$ , 300 K):**  $\delta$  [ppm] = 165.4 (SiNCH), 156.2 (CNMe $_2$ ), 138.2 (NCHCH), 137.4 (SiCHCH), 105.8 (SiCHCH), 40.3 (N(CH $_3$ ) $_2$ ), 30.4 (Si(C(CH $_3$ ) $_3$ )), 30.1 (Si(C(CH $_3$ ) $_3$ )), 22.5 (Si(C(CH $_3$ ) $_3$ )), 21.6 (Si(C(CH $_3$ ) $_3$ )), -4.9 (Si(CH $_3$ )).

**$^{29}\text{Si}\{^1\text{H}\}$  NMR (99 MHz,  $\text{C}_6\text{D}_6$ , 300 K):**  $\delta$  [ppm] = 2.0 (Si $^t$ Bu $_2$ Me), -28.1 (SiN).

**EA:**  $\text{Si}_3\text{C}_{25}\text{H}_{52}\text{N}_2$  Calculated [%]: C (64.58), H (11.27), N (6.03)

Experimental [%]: C (64.62), H (11.47), N (5.99)

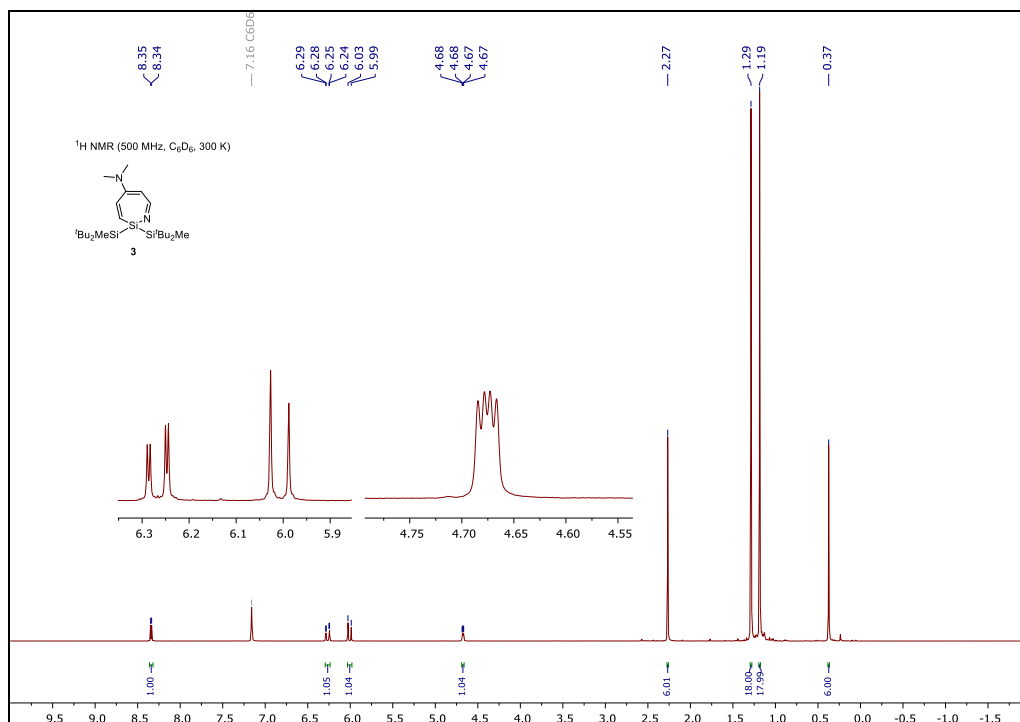

**Fig. S8:** <sup>1</sup>H NMR spectrum (500 MHz) of compound **3** in C<sub>6</sub>D<sub>6</sub> at 300 K.

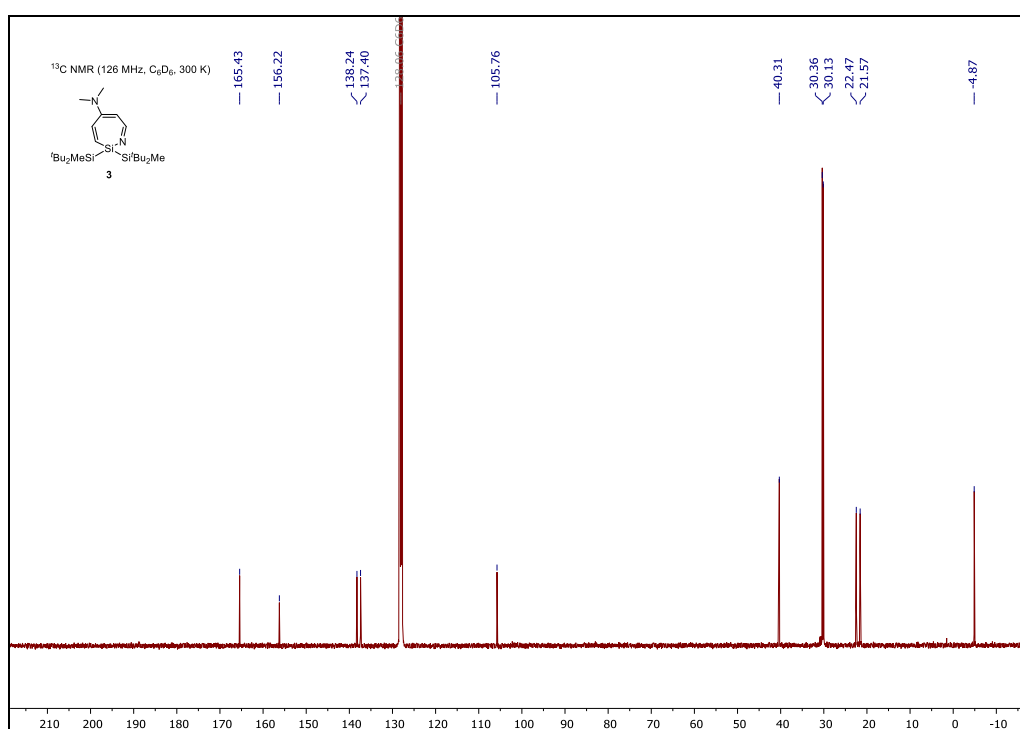

**Fig. S9:** <sup>13</sup>C NMR spectrum (126 MHz) of compound **3** in C<sub>6</sub>D<sub>6</sub> at 300 K.

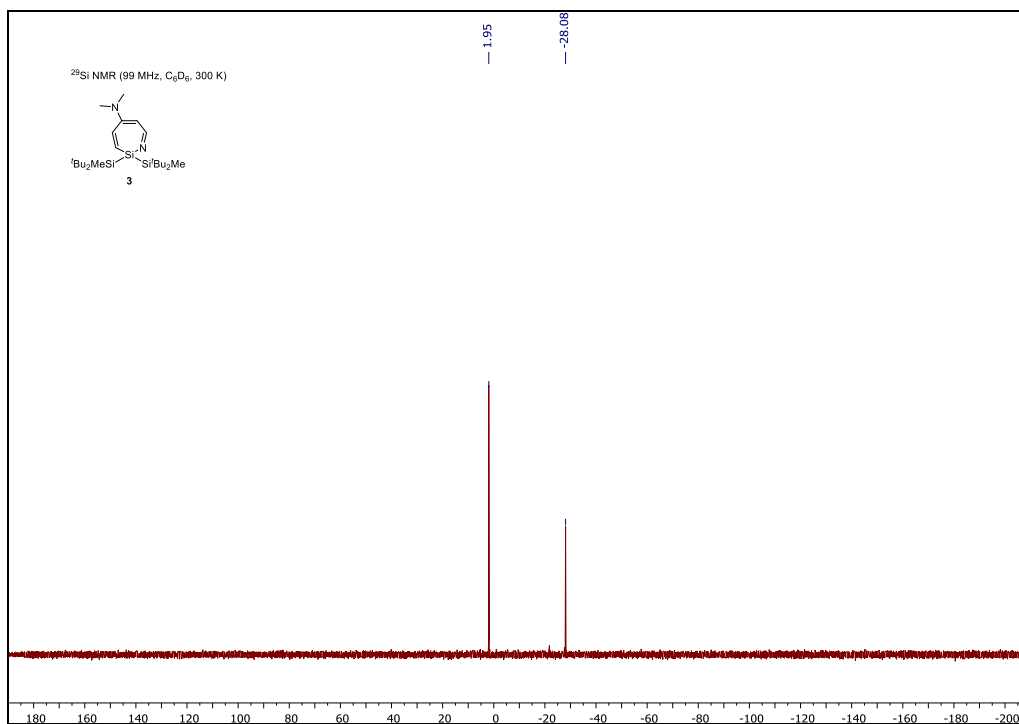

**Fig. S10:** <sup>29</sup>Si NMR spectrum (99 MHz) of compound **3** in C<sub>6</sub>D<sub>6</sub> at 300 K.

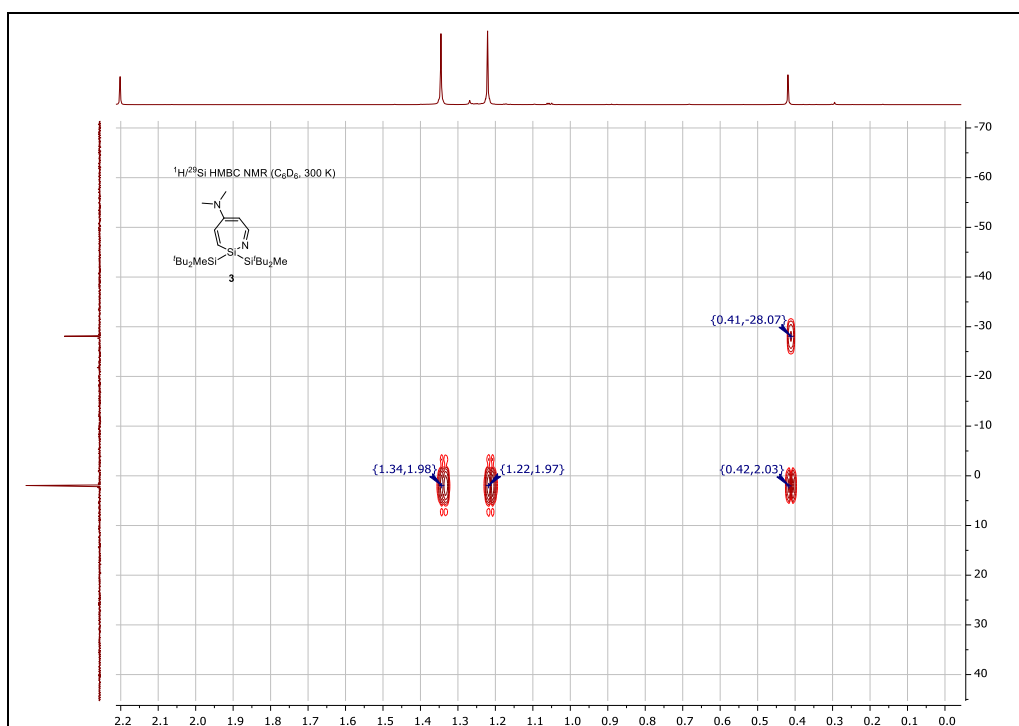

**Fig. S11:** <sup>1</sup>H/<sup>29</sup>Si HMBC NMR spectrum of compound **3** in C<sub>6</sub>D<sub>6</sub> at 300 K.

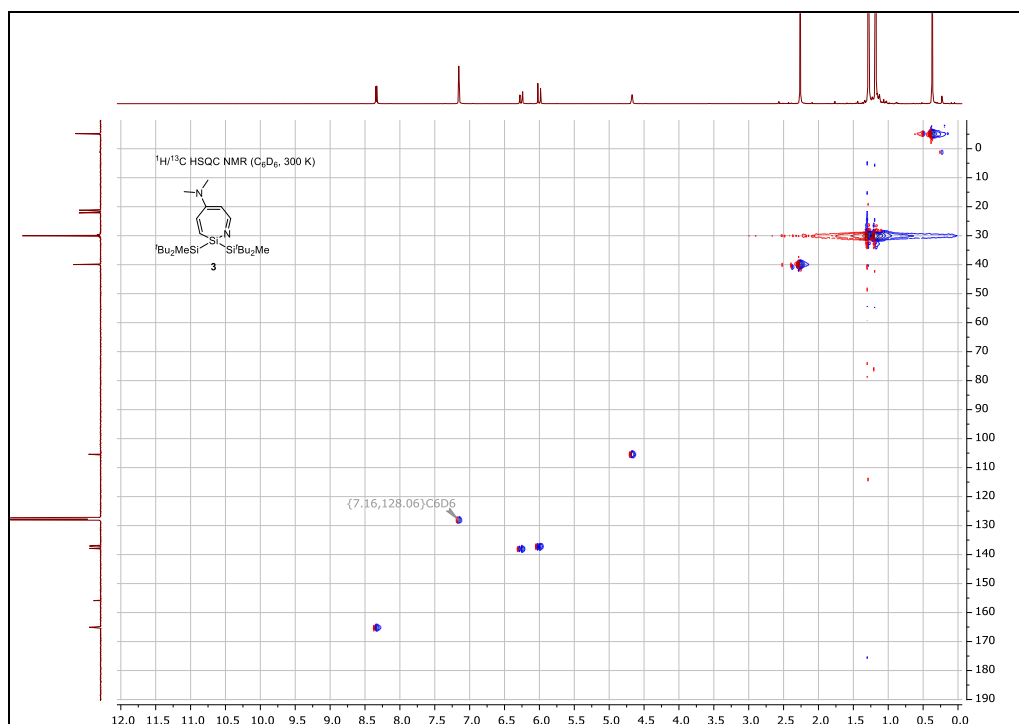

**Fig. S12:**  $^1\text{H}/^{13}\text{C}$  HSQC NMR spectrum of compound **3** in  $\text{C}_6\text{D}_6$  at 300 K.

## 1.6. Hexakis(trimethylsilyl)trisilirane (**4**)

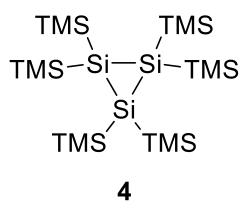

$\text{Si}_9\text{C}_{18}\text{H}_{54}$   
523.40 g/mol

A toluene solution of crude silylene **1c** (50 mg) was heated to 65 °C for 16 hours. After cooling down to ambient temperature, liberated DMAP was separated by precipitation with  $\text{SiBr}_4$  (26.9 mg, 77.5  $\mu\text{mol}$ , 1.0 eq.) and subsequent filtration. The resulting solution was concentrated under reduced pressure and compound **4** was obtained by crystallization at -35 °C as colorless solid (30.1 mg).

Note: Compound **4** has already been reported by Klinkhammer *et al.* from the attempted synthesis of the free silylene  $((\text{TMS})_3\text{Si})_2\text{Si}$ .<sup>[S7]</sup> Therefore, we did not analyze it further. DMAP forms an unidentified adduct with  $\text{SiBr}_4$  which is insoluble in common organic solvents. Thus, this adduct was not further analyzed.

**$^1\text{H}$  NMR (500 MHz,  $\text{C}_6\text{D}_6$ , 300 K):**  $\delta$  [ppm] = 0.43 (s, 54H,  $\text{Si}(\underline{\text{C}}\text{H}_3)_3$ ).

**$^{13}\text{C}\{^1\text{H}\}$  NMR (126 MHz,  $\text{C}_6\text{D}_6$ , 300 K):**  $\delta$  [ppm] = 4.7 ( $\text{Si}(\underline{\text{C}}\text{H}_3)_3$ ).

**$^{29}\text{Si}\{^1\text{H}\}$  NMR (99 MHz,  $\text{C}_6\text{D}_6$ , 300 K):**  $\delta$  [ppm] = -6.5 ( $\underline{\text{S}}\text{i}(\text{CH}_3)_3$ ), -168.6 ( $\underline{\text{S}}\text{i}(\text{TMS})_2$ ).

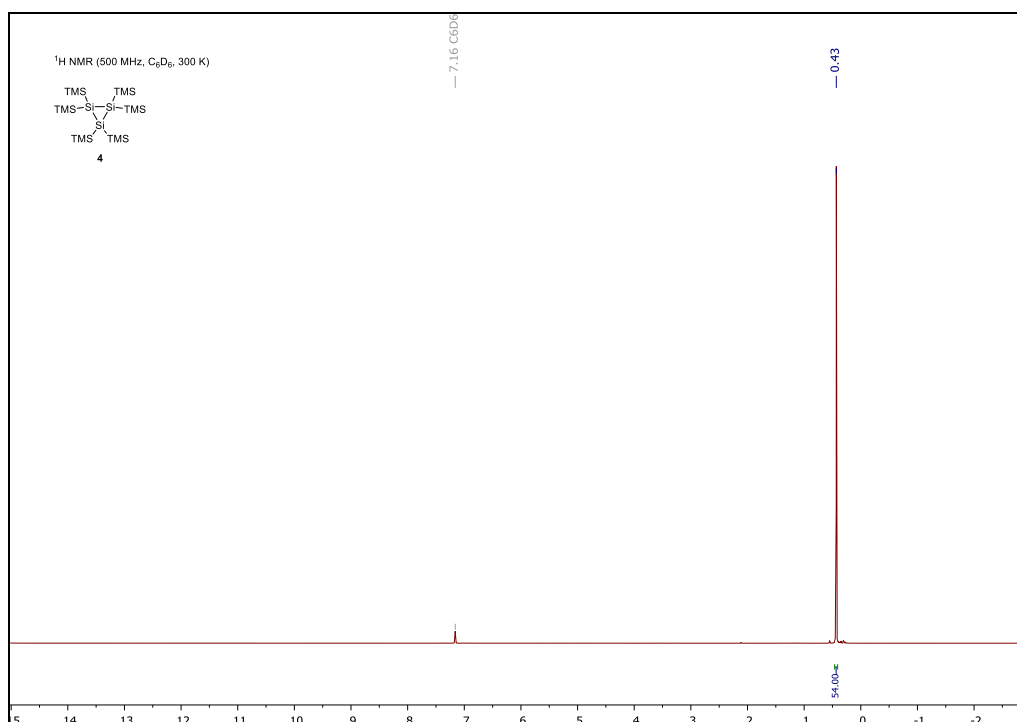

**Fig. S13:**  $^1\text{H}$  NMR spectrum (500 MHz) of compound **4** in  $\text{C}_6\text{D}_6$  at 300 K.

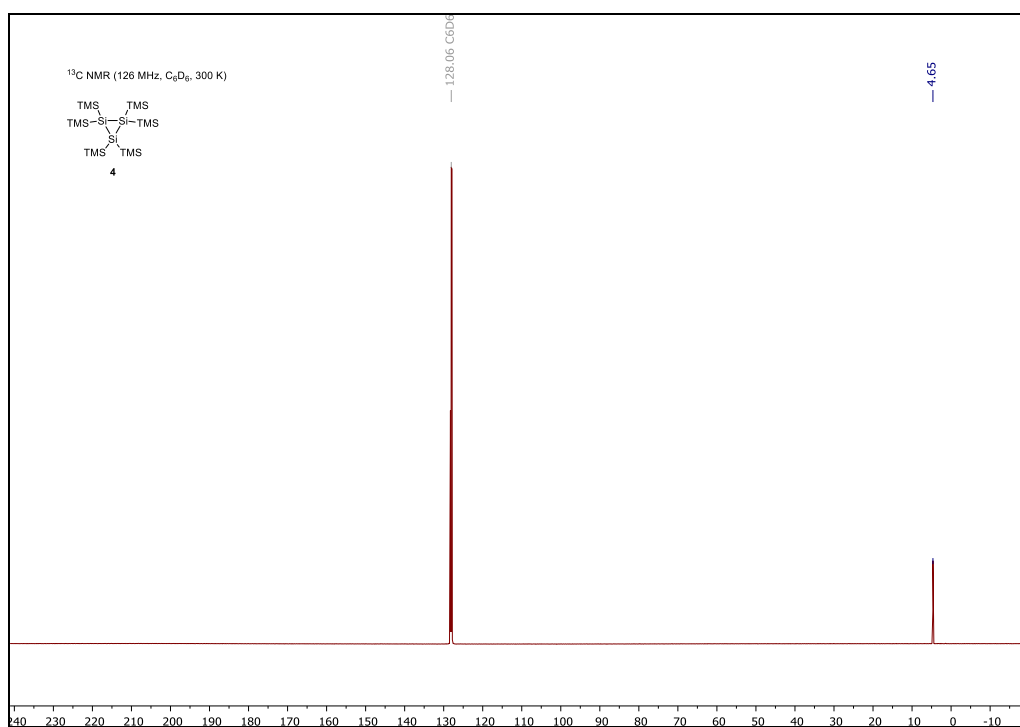

**Fig. S14:** <sup>13</sup>C NMR spectrum (126 MHz) of compound **4** in C<sub>6</sub>D<sub>6</sub> at 300 K.

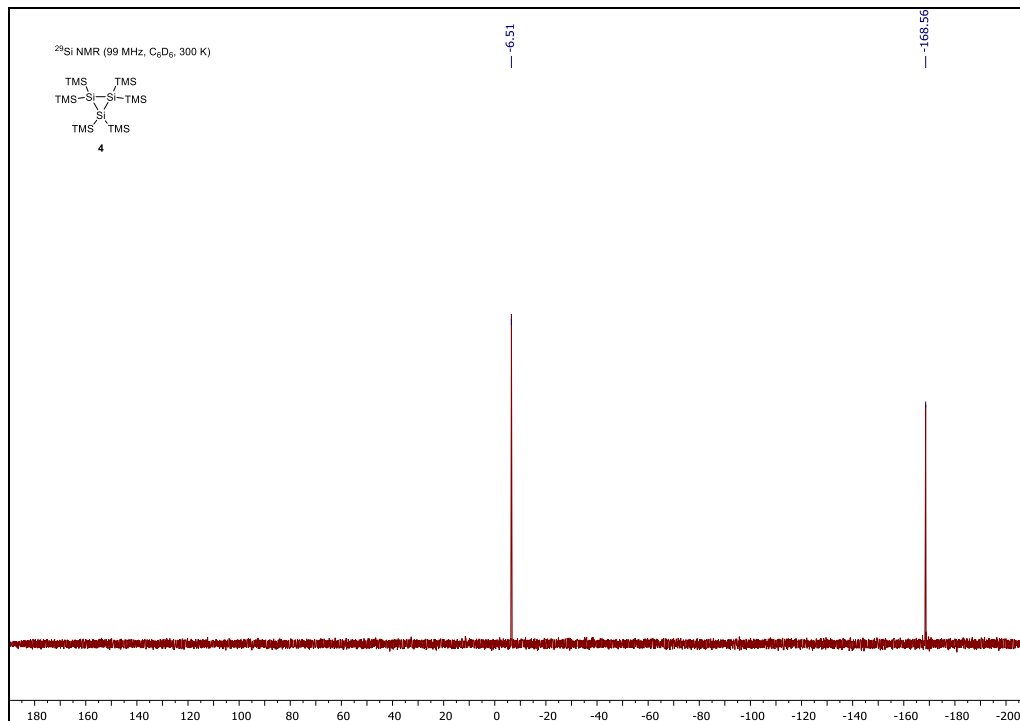

**Fig. S15:** <sup>29</sup>Si NMR spectrum (99 MHz) of compound **4** in C<sub>6</sub>D<sub>6</sub> at 300 K.

## 1.7. Hydrosilanes 5a-c

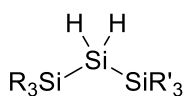

**5a** R = Si<sup>t</sup>Bu<sub>3</sub>, R' = Si(TMS)<sub>3</sub>

**5b** R = R' = Si(TMS)<sub>3</sub>

**5c** R = R' = Si<sup>t</sup>Bu<sub>2</sub>Me

In a pressurizable Schlenk flask, a solution of the respective DMAP-stabilized silylenes **1a-c** (100 μmol, 1.0 eq.) in toluene (5 mL) was frozen in liquid nitrogen, degassed and exposed to dihydrogen (1 bar). The reaction mixture was subsequently heated to 65 °C for 2 hours. Decolorization indicated full conversion. Concomitantly formed free DMAP was separated by

precipitation with SiBr<sub>4</sub> (100 μmol, 1.0 eq.) and filtration. The solvent was removed under reduced pressure to afford hydrosilanes **5** as colorless solids in quantitative yields. Compounds **5a-c** were identified by comparison of NMR spectral data with corresponding literature reports (**5a**,<sup>[S5]</sup> **5b**,<sup>[S2]</sup> **5c**<sup>[S3]</sup>).



## 1.8. Siliranes **6**

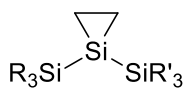

**6a** R = Si<sup>t</sup>Bu<sub>3</sub>, R' = Si(TMS)<sub>3</sub>

**6b** R = R' = Si<sup>t</sup>Bu<sub>2</sub>Me

The synthesis of siliranes **6** was conducted by a similar procedure than that for hydrosilanes **5** (*vide supra*). Instead of H<sub>2</sub>, the DMAP-silylene complexes **1a** and **1b** were exposed to ethylene (1 bar). The compounds **6** were obtained as colorless solids.

Silirane **6a** was identified by comparison of NMR spectral data with literature reports.<sup>[S5]</sup>

Compound **6b** was identified by multinuclear NMR spectroscopy.

### **6b**

**<sup>1</sup>H NMR (500 MHz, C<sub>6</sub>D<sub>6</sub>, 300 K):** δ [ppm] = 1.10 (s, 36H, C(CH<sub>3</sub>)<sub>3</sub>), 0.81 (s, 4H, CH<sub>2</sub>), 0.10 (s, 6H, Si(CH<sub>3</sub>)).

**<sup>13</sup>C NMR (126 MHz, C<sub>6</sub>D<sub>6</sub>, 300 K):** δ [ppm] = 29.9 (C(CH<sub>3</sub>)<sub>3</sub>), 21.8 (C(CH<sub>3</sub>)<sub>3</sub>), -0.7 (CH<sub>2</sub>), -6.3 (SiCH<sub>3</sub>)

**<sup>29</sup>Si{<sup>1</sup>H} NMR (99 MHz, C<sub>6</sub>D<sub>6</sub>, 300 K):** δ [ppm] = 11.2 (S<sup>t</sup>Bu<sub>2</sub>Me), -174.5 (S<sup>t</sup>CH<sub>2</sub>).

## 1.9. Silaimine 7a

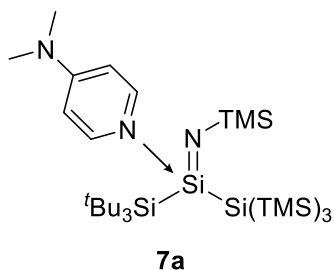

Si<sub>7</sub>C<sub>31</sub>H<sub>73</sub>N<sub>3</sub>

684.54 g/mol

Trimethylsilyl azide (11.6 mg, 100 μmol, 1.0 eq.) was added to a solution of silylene **1a** (60.0 mg, 100 μmol, 1.0 eq.) in benzene (2 mL) at ambient temperature. Decolorization from dark-brown to yellow and concomitant N<sub>2</sub> evolution was observed. After stirring the mixture for 1 hour, evaporation of the solvent under reduced pressure afforded compound **7a** as yellow solid (53.8 mg, 78.6 μmol, 78%). Crystals suitable for SC-XRD analysis were obtained from a cooled (-35 °C) *n*-hexane solution of **7a**.

Note: Compound **7a** decomposes in solution under liberation of DMAP. Presumably, the donor-free silaimine is formed that decomposes further to an unidentified mixture of products.

**<sup>1</sup>H NMR (500 MHz, C<sub>6</sub>D<sub>6</sub>, 300 K):** δ [ppm] = 9.42 (br. s, 1H, *o*-C<sup>DMAP</sup>H), 8.50 (br. s, 1H, *o*-C<sup>DMAP</sup>H), 6.06 (d, <sup>3</sup>J = 6.9 Hz, 2H, *m*-C<sup>DMAP</sup>H), 1.83 (s, 6H, N(CH<sub>3</sub>)<sub>2</sub>), 1.41 (s, 27H, Si(C(CH<sub>3</sub>)<sub>3</sub>)), 0.69 (s, 9H, NSi(CH<sub>3</sub>)<sub>3</sub>), 0.47 (s, 27H, Si(Si(CH<sub>3</sub>)<sub>3</sub>)<sub>3</sub>).

**<sup>13</sup>C NMR (126 MHz, C<sub>6</sub>D<sub>6</sub>, 300 K):** δ [ppm] = 155.9 (*p*-C<sup>DMAP</sup>), 150.6 (*o*-C<sup>DMAP</sup>), 106.9 (*m*-C<sup>DMAP</sup>), 38.3 (N(CH<sub>3</sub>)<sub>2</sub>), 33.3 (C(CH<sub>3</sub>)<sub>3</sub>), 25.1 (C(CH<sub>3</sub>)<sub>3</sub>), 7.7 (NSi(CH<sub>3</sub>)), 5.3 (Si(Si(CH<sub>3</sub>)<sub>3</sub>)).

**<sup>29</sup>Si{<sup>1</sup>H} NMR (99 MHz, C<sub>6</sub>D<sub>6</sub>, 300 K):** δ [ppm] = 2.0 (Si<sup>t</sup>Bu<sub>3</sub>), -9.4 (Si(Si<sup>t</sup>Me<sub>3</sub>)<sub>3</sub>), -25.1 (N(Si<sup>t</sup>Me<sub>3</sub>)), -25.9 (Si=N), -121.3 (Si(SiMe<sub>3</sub>)<sub>3</sub>).

## 1.10. Silimine 7b

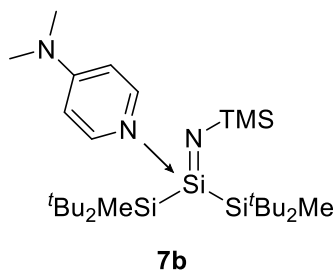

$\text{Si}_4\text{C}_{28}\text{H}_{61}\text{N}_3$

552.16 g/mol

Analog to the synthesis of **7a** (*vide supra*) silylene **1b** (25 mg, 53.8  $\mu\text{mol}$ , 1.0 eq.) was treated with trimethylsilyl azide (6.19 mg, 53.8  $\mu\text{mol}$ , 1.0 eq.) to afford silimine **7b** as yellow, crystalline solid (28.4 mg, 51.4  $\mu\text{mol}$ , 96%).

**$^1\text{H}$  NMR (500 MHz,  $\text{C}_6\text{D}_6$ , 300 K):**  $\delta$  [ppm] = 8.82-8.81 (m, 2H,  $o\text{-C}^{\text{DMAP}}\text{H}$ ), 5.79 (d,  $^3J = 7.3$  Hz, 2H,  $m\text{-C}^{\text{DMAP}}\text{H}$ ), 1.80 (s, 6H,  $\text{N}(\text{CH}_3)_2$ ), 1.34 (s, 18H,  $\text{C}(\text{CH}_3)_3$ ), 1.16 (s, 18H,  $\text{C}(\text{CH}_3)_3$ ), 0.72 (s, 9H,  $\text{Si}(\text{CH}_3)_3$ ), 0.42 (s, 6H,  $\text{Si}(\text{CH}_3)_2$ ).

**$^{13}\text{C}\{^1\text{H}\}$  NMR (126 MHz,  $\text{C}_6\text{D}_6$ , 300 K):**  $\delta$  [ppm] = 155.8 ( $p\text{-C}^{\text{DMAP}}$ ), 145.7 ( $o\text{-C}^{\text{DMAP}}$ ), 106.3 ( $m\text{-C}^{\text{DMAP}}$ ), 38.3 ( $\text{N}(\text{CH}_3)_2$ ), 31.1 ( $\text{C}(\text{CH}_3)_3$ ), 31.1 ( $\text{C}(\text{CH}_3)_3$ ), 22.5 ( $\text{C}(\text{CH}_3)_3$ ), 22.3 ( $\text{C}(\text{CH}_3)_3$ ), -4.5 ( $\text{Si}(\text{CH}_3)_2$ ).

**$^{29}\text{Si}\{^1\text{H}\}$  NMR (99 MHz,  $\text{C}_6\text{D}_6$ , 300 K):**  $\delta$  [ppm] = -8.8 ( $\text{Si}^t\text{Bu}_2\text{Me}$ ), -24.9 ( $\text{SiMe}_3$ ), -25.5 ( $\text{Si}=\text{N}$ ).

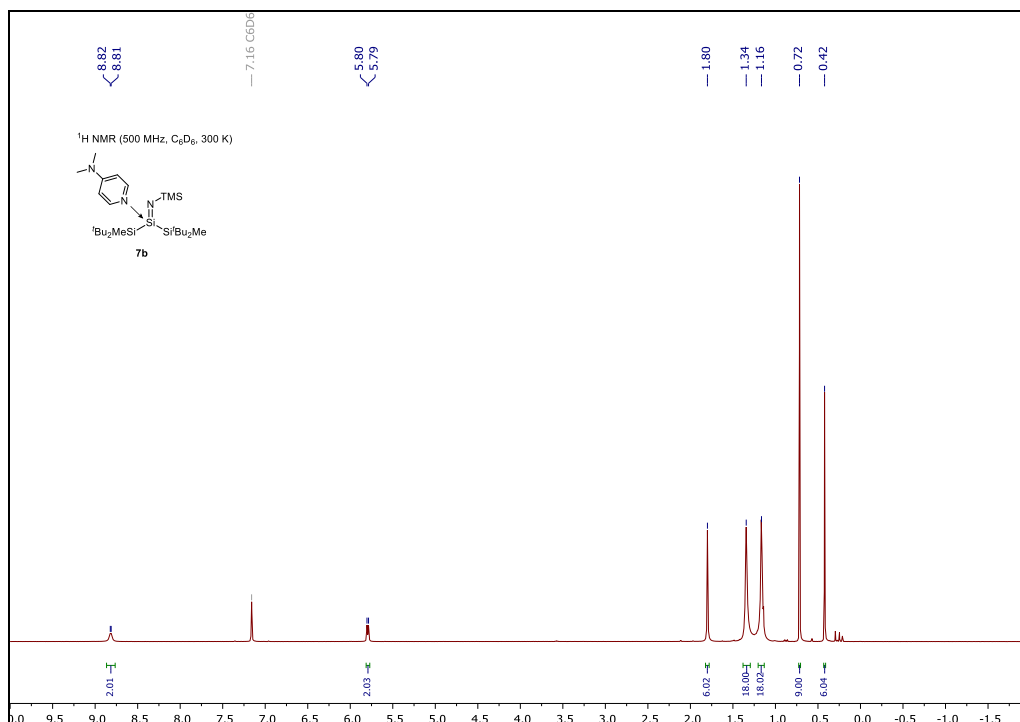

**Fig. S16:**  $^1\text{H}$  NMR spectrum (500 MHz) of compound **7b** in  $\text{C}_6\text{D}_6$  at 300 K.

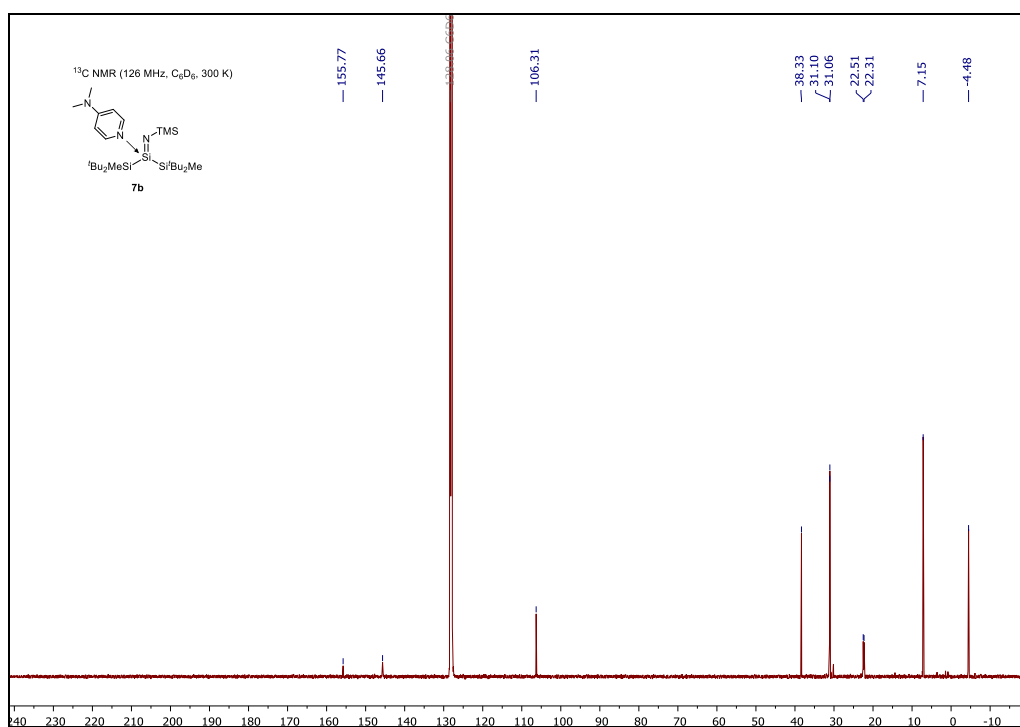

**Fig. S17:** <sup>13</sup>C NMR spectrum (126 MHz) of compound **7b** in C<sub>6</sub>D<sub>6</sub> at 300 K.

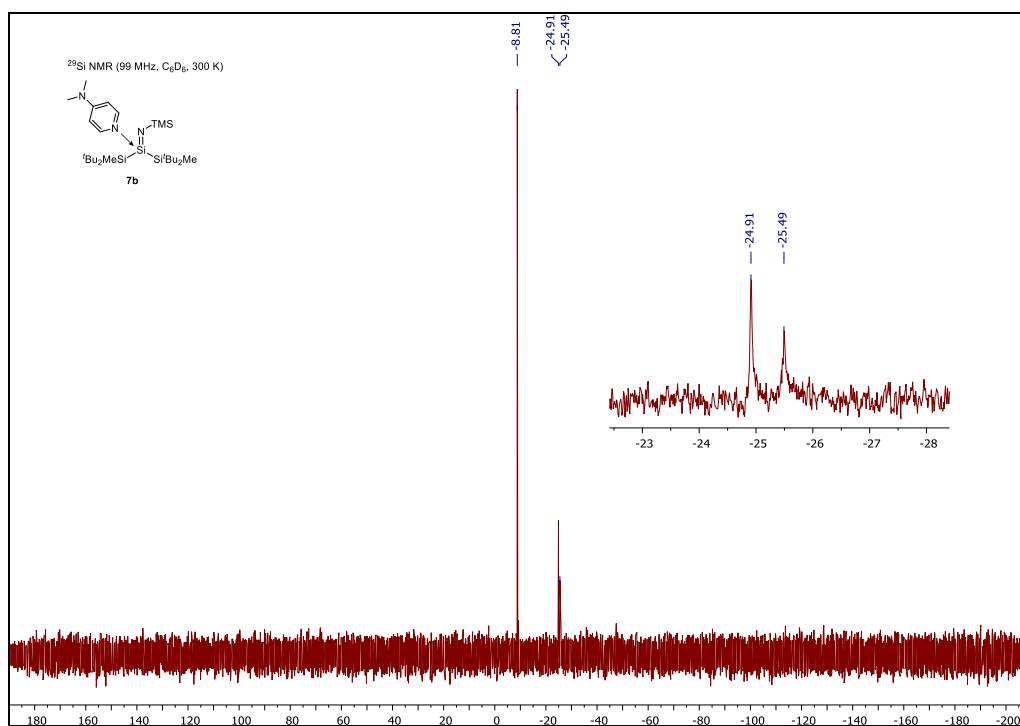

**Fig. S18:** <sup>29</sup>Si NMR spectrum (99 MHz) of compound **7b** in C<sub>6</sub>D<sub>6</sub> at 300 K.

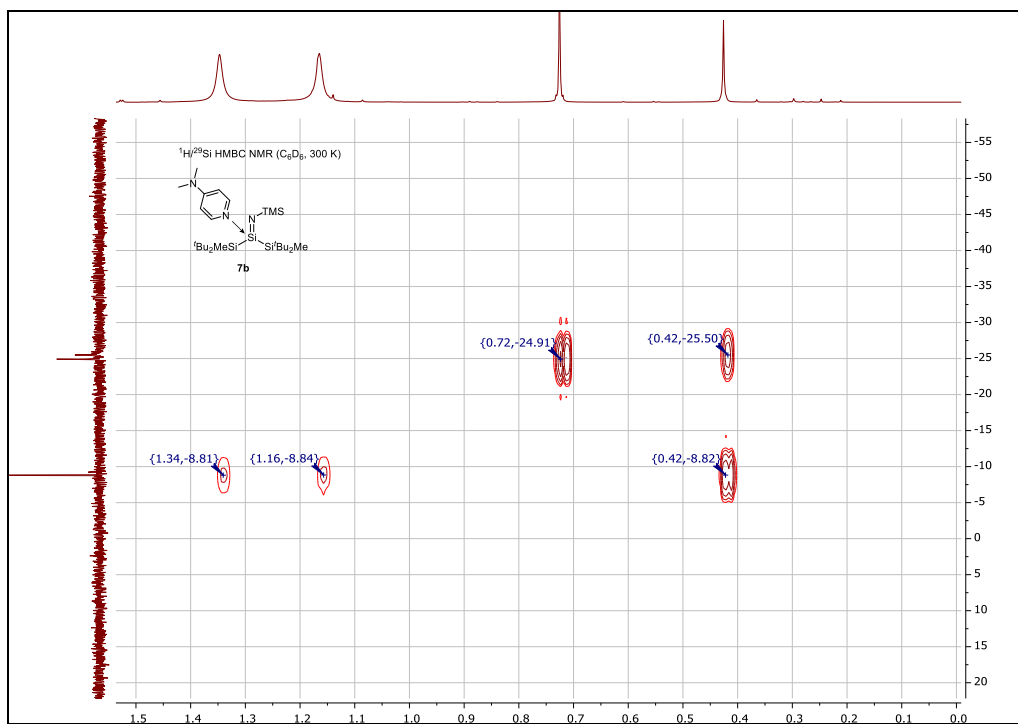

**Fig. S19:**  $^1\text{H}/^{29}\text{Si}$  HMBC NMR spectrum of compound **7b** in  $\text{C}_6\text{D}_6$  at 300 K.

## 2. X-ray Crystallographic Data

### 2.1. General Information

The X-ray intensity data of **2** were collected on an X-ray single crystal diffractometer equipped with a CMOS detector (*Bruker Photon-100*), a rotating anode (*Bruker TXS*) with MoK $\alpha$  radiation ( $\lambda = 0.71073 \text{ \AA}$ ) and a *Helios* mirror optic by using the *APEX III* software package.<sup>[S8]</sup> The X-ray intensity data of **1b** and **7a** were collected on an X-ray single crystal diffractometer equipped with a CMOS detector (*Bruker Photon-100*), an IMS microsource with MoK $\alpha$  radiation ( $\lambda = 0.71073 \text{ \AA}$ ) and a *Helios* mirror optic by using the *APEX III* software package.<sup>[S8]</sup> The X-ray intensity data of **3** was collected on an X-ray single crystal diffractometer equipped with a CCD detector (*Apex II CCD*), a fine-focus sealed tube with MoK $\alpha$  radiation ( $\lambda = 0.71073 \text{ \AA}$ ) and a *Triumph* monochromator by using the *APEX II/III* software package.<sup>[S8]</sup> The measurements were performed on single crystals coated with the perfluorinated ether *Fomblin*<sup>®</sup> Y. The crystal was fixed on the top of a micro sampler, transferred to the diffractometer and frozen under a stream of cold nitrogen. A matrix scan was used to determine the initial lattice parameters. Reflections were merged and corrected for Lorenz and polarization effects, scan speed, and background using *SAINT*.<sup>[S9]</sup> Absorption corrections, including odd and even ordered spherical harmonics were performed using *SADABS*.<sup>[S9]</sup> Space group assignments were based upon systematic absences, E statistics, and successful refinement of the structures. Structures were solved by direct methods with the aid of successive difference Fourier maps, and were refined against all data using the *APEX III* software in conjunction with *SHELXL-2014*<sup>[S10]</sup> and *SHELXLE*.<sup>[S11]</sup> All H atoms were placed in calculated positions and refined using a riding model, with methylene and aromatic C–H distances of 0.99 and 0.95  $\text{\AA}$ , respectively, and  $U_{\text{iso}}(\text{H}) = 1.2 \cdot U_{\text{eq}}(\text{C})$ . Full-matrix least-squares refinements were carried out by minimizing  $\Delta w(F_o^2 - F_c^2)$ <sup>[S9]</sup> with *SHELXL-97* weighting scheme.<sup>[S12]</sup> Neutral atom scattering factors for all atoms and anomalous dispersion corrections for the non-hydrogen atoms were taken from International Tables for Crystallography.<sup>[S13]</sup> The images of the crystal structures were generated by *Mercury*.<sup>[S14]</sup> The CCDC numbers CCDC-1967942 (**1b**), CCDC-1967943 (**2**), CCDC-1967944 (**3**) and CCDC-1967945 (**7a**) contain the supplementary crystallographic data for the structures. These data can be obtained free of charge from the Cambridge Crystallographic Data Centre via <https://www.ccdc.cam.ac.uk/structures/>.

## 2.2 SC-XRD structures

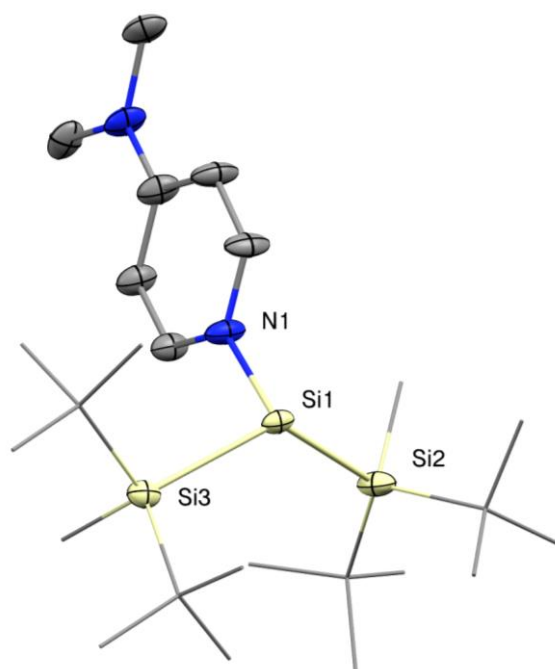

**Fig. S20:** SC-XRD structure of silylene **1b** with thermal ellipsoids drawn at the 30% probability level. Hydrogen atoms are omitted for clarity, <sup>t</sup>Bu- and Me-groups are simplified as wireframes. Selected bond lengths [Å] and angles [°]: Si1–N1 1.937(5), Si1–Si2 2.390(3), Si1–Si3 2.378(3), Si2–Si1–Si3 123.1(1), Si2–Si1–N1 96.2(2), Si3–Si1–N1 98.8(2).

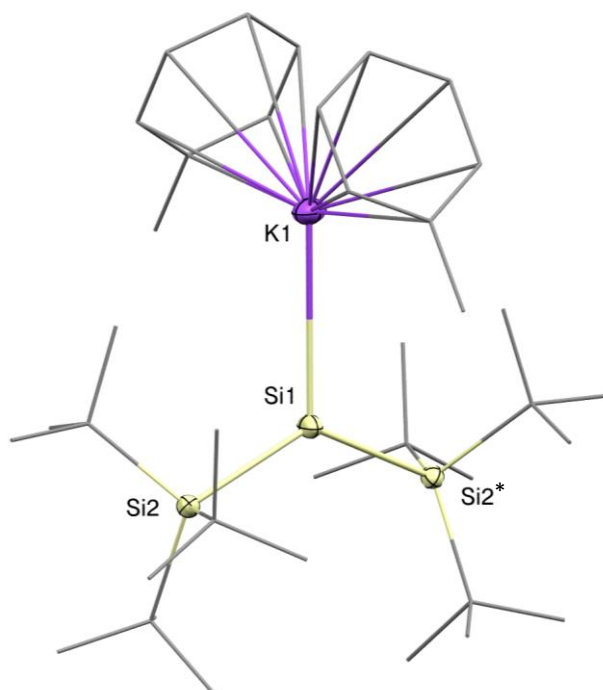

**Fig. S21:** SC-XRD structure of silyl radical **2** with thermal ellipsoids drawn at the 30% probability level. Hydrogen atoms are omitted for clarity, <sup>t</sup>Bu-groups and toluene molecules are simplified as wireframes. Selected bond lengths [Å] and angles [°]: Si1–Si2 2.3936(14), Si1–K1 3.315(2), K1–Si1–Si2 114.91(2), Si2–Si1–Si2\* 130.19(3).

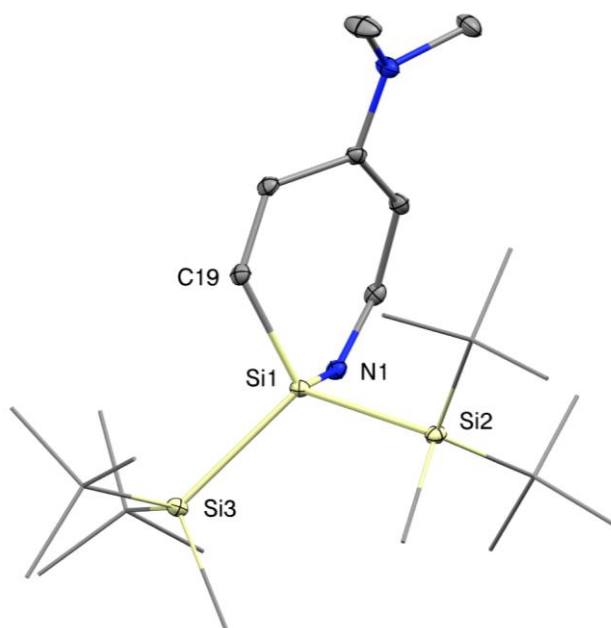

**Fig. S22:** SC-XRD structure of azasilepin **3** with thermal ellipsoids drawn at the 30% probability level. Hydrogen atoms are omitted for clarity, <sup>t</sup>Bu- and Me-groups are simplified as wireframes. Selected bond lengths [Å] and angles [°]: Si1–N1 1.750(1), Si1–C19 1.878(1), Si1–Si2 2.4144(6), Si2–Si1–Si3 113.74(2), Si2–Si1–N1 109.08(4), N1–Si1–C19 104.71(5).

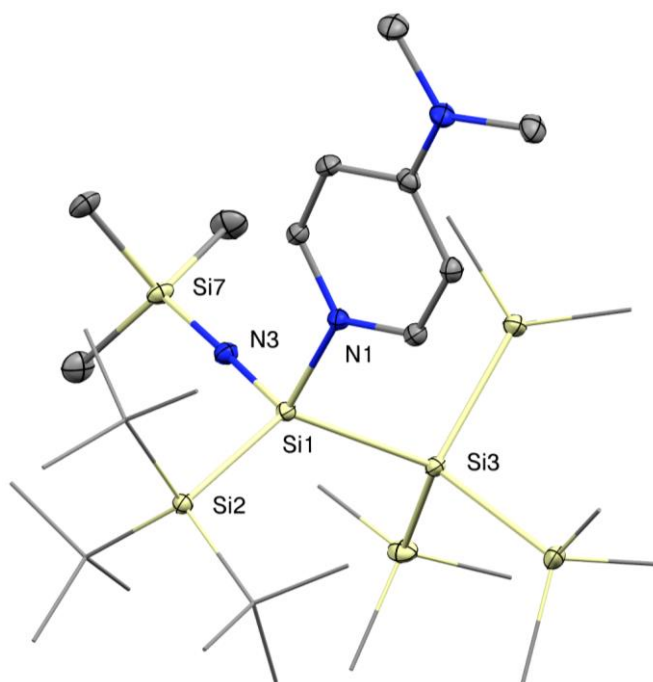

**Fig. S23:** SC-XRD structure of silaimine **7a** with thermal ellipsoids drawn at the 30% probability level. Hydrogen atoms are omitted for clarity, <sup>t</sup>Bu- and Me-groups are simplified as wireframes. Selected bond lengths [Å] and angles [°]: Si1–Si2 2.453(1), Si1–N1 1.928(2), Si1–N3 1.616(2), N3–Si7 1.660(2), Si2–Si1–Si3 125.08(3), N1–Si1–N3 106.08(8), Si1–N3–Si7 177.1(1).



## 2.3 Crystal data and structural refinement parameters

**Table S1:** Crystal data and structural refinement parameters for compounds **1**, **3**, **4** and **7a**.

| Compound #                          | 1b                                                                                                                                      | 2                                                                                                                                                             | 3                                                                                                                                                             | 7a                                                                                                                                                            |
|-------------------------------------|-----------------------------------------------------------------------------------------------------------------------------------------|---------------------------------------------------------------------------------------------------------------------------------------------------------------|---------------------------------------------------------------------------------------------------------------------------------------------------------------|---------------------------------------------------------------------------------------------------------------------------------------------------------------|
| CCDC #                              | 1967942                                                                                                                                 | 1967943                                                                                                                                                       | 1967944                                                                                                                                                       | 1967945                                                                                                                                                       |
| Chemical formula                    | C <sub>25</sub> H <sub>52</sub> N <sub>2</sub> Si <sub>3</sub>                                                                          | C <sub>38</sub> H <sub>70</sub> KSi <sub>3</sub>                                                                                                              | C <sub>25</sub> H <sub>52</sub> N <sub>2</sub> Si <sub>3</sub>                                                                                                | C <sub>31</sub> H <sub>73</sub> N <sub>3</sub> Si <sub>7</sub>                                                                                                |
| Formula weight                      | 464.96                                                                                                                                  | 650.31                                                                                                                                                        | 464.96                                                                                                                                                        | 684.55                                                                                                                                                        |
| Temperature                         | 100(2) K                                                                                                                                | 100(2) K                                                                                                                                                      | 100(2) K                                                                                                                                                      | 100(2) K                                                                                                                                                      |
| Wavelength                          | 0.71073 Å                                                                                                                               | 0.71073 Å                                                                                                                                                     | 0.71073 Å                                                                                                                                                     | 0.71073 Å                                                                                                                                                     |
| Crystal size                        | 0.209 × 0.235 × 0.373 mm                                                                                                                | 0.176 × 0.299 × 0.302 mm                                                                                                                                      | 0.268 × 0.342 × 0.398 mm                                                                                                                                      | 0.059 × 0.153 × 0.213 mm                                                                                                                                      |
| Crystal habit                       | clear dark red-brown fragment                                                                                                           | clear yellow fragment                                                                                                                                         | clear yellow fragment                                                                                                                                         | clear yellow fragment                                                                                                                                         |
| Crystal system                      | monoclinic                                                                                                                              | monoclinic                                                                                                                                                    | orthorhombic                                                                                                                                                  | triclinic                                                                                                                                                     |
| Space group                         | C 2/c                                                                                                                                   | C 2/c                                                                                                                                                         | P b c a                                                                                                                                                       | P -1                                                                                                                                                          |
| Unit cell dimensions                | a = 28.128(4) Å, α = 90°<br>b = 15.312(2) Å, β = 110.180(4)°<br>c = 14.6773(19) Å, γ = 90°                                              | a = 20.678(7) Å, α = 90°<br>b = 12.877(5) Å, β = 120.067(10)°<br>c = 17.566(10) Å, γ = 90°                                                                    | a = 11.9770(13) Å, α = 90°<br>b = 16.9418(17) Å, α = 90°<br>c = 28.631(3) Å, α = 90°                                                                          | a = 11.515(9) Å, α = 97.728(17)°<br>b = 11.940(9) Å, β = 92.844(18)°<br>c = 16.100(7) Å, γ = 104.175(19)°                                                     |
| Volume                              | 5933.4(14) Å <sup>3</sup>                                                                                                               | 4048(3) Å <sup>3</sup>                                                                                                                                        | 5809.6(11) Å <sup>3</sup>                                                                                                                                     | 2119(2) Å <sup>3</sup>                                                                                                                                        |
| Z                                   | 8                                                                                                                                       | 4                                                                                                                                                             | 8                                                                                                                                                             | 2                                                                                                                                                             |
| Density (calculated)                | 1.041 g/cm <sup>3</sup>                                                                                                                 | 1.067 g/cm <sup>3</sup>                                                                                                                                       | 1.063 g/cm <sup>3</sup>                                                                                                                                       | 1.073 g/cm <sup>3</sup>                                                                                                                                       |
| Absorption coefficient              | 0.174 mm <sup>-1</sup>                                                                                                                  | 0.243 mm <sup>-1</sup>                                                                                                                                        | 0.178 mm <sup>-1</sup>                                                                                                                                        | 0.248 mm <sup>-1</sup>                                                                                                                                        |
| F(000)                              | 2064                                                                                                                                    | 1436                                                                                                                                                          | 2064                                                                                                                                                          | 756                                                                                                                                                           |
| Diffractometer                      | Bruker D8 Venture Duo IMS                                                                                                               | Bruker D8 Venture                                                                                                                                             | Bruker D8 Kappa Apex II                                                                                                                                       | Bruker D8 Venture Duo IMS                                                                                                                                     |
| Radiation source                    | IMS microsource, Mo                                                                                                                     | TXS rotating anode, Mo                                                                                                                                        | fine-focus sealed tube, Mo                                                                                                                                    | IMS microsource, Mo                                                                                                                                           |
| Theta range for data collection     | 1.94 to 25.35°                                                                                                                          | 2.28 to 25.68°                                                                                                                                                | 2.20 to 26.37°                                                                                                                                                | 2.03 to 25.35°                                                                                                                                                |
| Index ranges                        | -33<=h<=33, -18<=k<=18, -17<=l<=17                                                                                                      | -25<=h<=25, -15<=k<=15, -21<=l<=20                                                                                                                            | -14<=h<=14, -21<=k<=21, -35<=l<=35                                                                                                                            | -13<=h<=13, -14<=k<=14, -18<=l<=19                                                                                                                            |
| Reflections collected               | 36869                                                                                                                                   | 68970                                                                                                                                                         | 188411                                                                                                                                                        | 89033                                                                                                                                                         |
| Independent reflections             | 5424 [R(int) = 0.0913]                                                                                                                  | 3797 [R(int) = 0.0742]                                                                                                                                        | 5931 [R(int) = 0.0304]                                                                                                                                        | 7757 [R(int) = 0.0458]                                                                                                                                        |
| Coverage of independent reflections | 99.8%                                                                                                                                   | 98.6%                                                                                                                                                         | 99.8%                                                                                                                                                         | 99.9%                                                                                                                                                         |
| Absorption correction               | Multi-Scan                                                                                                                              | Multi-Scan                                                                                                                                                    | Multi-Scan                                                                                                                                                    | Multi-Scan                                                                                                                                                    |
| Refinement method                   | Full-matrix least-squares on F <sup>2</sup>                                                                                             | Full-matrix least-squares on F <sup>2</sup>                                                                                                                   | Full-matrix least-squares on F <sup>2</sup>                                                                                                                   | Full-matrix least-squares on F <sup>2</sup>                                                                                                                   |
| Refinement program                  | SHELXL-2017/1 (Sheldrick, 2017)                                                                                                         | SHELXL-2016/6 (Sheldrick, 2016)                                                                                                                               | SHELXL-2016/6 (Sheldrick, 2016)                                                                                                                               | SHELXL-2016/6 (Sheldrick, 2016)                                                                                                                               |
| Function minimized                  | Σ w(F <sub>o</sub> <sup>2</sup> - F <sub>c</sub> <sup>2</sup> ) <sup>2</sup>                                                            | Σ w(F <sub>o</sub> <sup>2</sup> - F <sub>c</sub> <sup>2</sup> ) <sup>2</sup>                                                                                  | Σ w(F <sub>o</sub> <sup>2</sup> - F <sub>c</sub> <sup>2</sup> ) <sup>2</sup>                                                                                  | Σ w(F <sub>o</sub> <sup>2</sup> - F <sub>c</sub> <sup>2</sup> ) <sup>2</sup>                                                                                  |
| Data / restraints / parameters      | 5424 / 6 / 328                                                                                                                          | 3797 / 0 / 202                                                                                                                                                | 5931 / 0 / 287                                                                                                                                                | 7757 / 0 / 393                                                                                                                                                |
| Goodness-of-fit on F <sup>2</sup>   | 1.172                                                                                                                                   | 1.040                                                                                                                                                         | 1.045                                                                                                                                                         | 1.123                                                                                                                                                         |
| Final R indices                     | 4238 data;  I>2σ(I):<br>R1 = 0.1217, wR2 = 0.2651<br>all data: R1 = 0.1445, wR2 = 0.2780                                                | 3472 data;  I>2σ(I):<br>R1 = 0.0305, wR2 = 0.0855<br>all data: R1 = 0.0341, wR2 = 0.0886                                                                      | 5356 data;  I>2σ(I):<br>R1 = 0.0289, wR2 = 0.0771<br>all data: R1 = 0.0334, wR2 = 0.0802                                                                      | 7180 data;  I>2σ(I):<br>R1 = 0.0402, wR2 = 0.0992<br>all data: R1 = 0.0439, wR2 = 0.1016                                                                      |
| Weighting scheme                    | w=1/[σ <sup>2</sup> (F <sub>o</sub> <sup>2</sup> )+108.1245P]<br>where P=(F <sub>o</sub> <sup>2</sup> +2F <sub>c</sub> <sup>2</sup> )/3 | w=1/[σ <sup>2</sup> (F <sub>o</sub> <sup>2</sup> )+(0.0477P) <sup>2</sup> +2.4242P]<br>where P=(F <sub>o</sub> <sup>2</sup> +2F <sub>c</sub> <sup>2</sup> )/3 | w=1/[σ <sup>2</sup> (F <sub>o</sub> <sup>2</sup> )+(0.0388P) <sup>2</sup> +3.2781P]<br>where P=(F <sub>o</sub> <sup>2</sup> +2F <sub>c</sub> <sup>2</sup> )/3 | w=1/[σ <sup>2</sup> (F <sub>o</sub> <sup>2</sup> )+(0.0445P) <sup>2</sup> +1.7142P]<br>where P=(F <sub>o</sub> <sup>2</sup> +2F <sub>c</sub> <sup>2</sup> )/3 |
| Largest diff. peak and hole         | 0.560 and -0.742 eÅ <sup>-3</sup>                                                                                                       | 0.263 and -0.218 eÅ <sup>-3</sup>                                                                                                                             | 0.366 and -0.261 eÅ <sup>-3</sup>                                                                                                                             | 0.634 and -0.258 eÅ <sup>-3</sup>                                                                                                                             |
| R.M.S. deviation from mean          | 0.104 eÅ <sup>-3</sup>                                                                                                                  | 0.040 eÅ <sup>-3</sup>                                                                                                                                        | 0.042 eÅ <sup>-3</sup>                                                                                                                                        | 0.058 eÅ <sup>-3</sup>                                                                                                                                        |

### 3. References

- [S1] G. R. Fulmer, A. J. M. Miller, N. H. Sherden, H. E. Gottlieb, A. Nudelman, B. M. Stoltz, J. E. Bercaw, K. I. Goldberg, *Organometallics* **2010**, *29*, 2176-2179.
- [S2] T. Gross, H. Reinke, H. Oehme, *Can. J. Chem.* **2000**, *78*, 1399-1404.
- [S3] A. Sekiguchi, T. Fukawa, M. Nakamoto, V. Y. Lee, M. Ichinohe, *J. Am. Chem. Soc.* **2002**, *124*, 9865-9869.
- [S4] N. Wiberg, W. Niedermayer, H. Nöth, J. Knizek, W. Ponikwar, K. Polborn, D. Fenske, G. Baum, *Z. Anorg. Allg. Chem.* **2001**, *627*, 594-606.
- [S5] D. Reiter, R. Holzner, A. Porzelt, P. J. Altmann, P. Frisch, S. Inoue, *J. Am. Chem. Soc.* **2019**, *141*, 13536-13546.
- [S6] K. Fredenhagen, G. Cadenbach, *Z. Anorg. Allg. Chem.* **1926**, *158*, 249-263.
- [S7] a) K. W. Klinkhammer, *Chem. Eur. J.* **1997**, *3*, 1418-1431. ; b) K. W. Klinkhammer, *Organosilicon Chemistry III - From Molecules to Materials* (Eds.: N. Auner, J. Weis), Wiley-VCH, **1997**.
- [S8] *APEX suite of crystallographic software*, APEX 3 version 2015.5-2; Bruker AXS Inc.: Madison, Wisconsin, USA, 2015.
- [S9] *SAINT*, Version 7.56a and *SADABS* Version 2008/1; Bruker AXS Inc.: Madison, Wisconsin, USA, 2008.
- [S10] G. M. Sheldrick, *SHELXL-2014*, University of Göttingen, Göttingen, Germany, 2014.
- [S11] C. B. Hübschle, G. M. Sheldrick, B. Dittrich, *J. Appl. Cryst.* **2011**, *44*, 1281-1284.
- [S12] G. M. Sheldrick, *SHELXL-97*, University of Göttingen, Göttingen, Germany, 1998.
- [S13] A. J. C. Wilson, *International Tables for Crystallography*, Volume C, Tables 6.1.1.4 (pp. 500-502), 4.2.6.8 (pp. 219-222), and 4.2.4.2 (pp. 193-199), Kluwer Academic Publishers: Dordrecht, The Netherlands, **1992**.
- [S14] C. F. Macrae, I. J. Bruno, J. A. Chisholm, P. R. Edgington, P. McCabe, E. Pidcock, L. Rodriguez-Monge, R. Taylor, J. van de Streek, P. A. Wood, *J. Appl. Cryst.* **2008**, *41*, 466-470.
